# Supplementary material for: Novel HMO-Glasses with Sb2O3 and TeO2 for Nuclear Radiation Shielding Purposes: A Comparative Analysis with Traditional and Novel Shields
Source: MDPI journal article supplement (doi:10.3390/ma14154330), 2021-08-03
Supplement: s1 [file s1]

## Supplementary Materials

# Novel HMO-Glasses with $\text{Sb}_2\text{O}_3$ and $\text{TeO}_2$ for Nuclear Radiation Shielding Purposes: A Comparative Analysis with Traditional and Novel Shields

Ghada ALMisned <sup>1</sup>, Huseyin Ozan Tekin <sup>2,3</sup>, Shams A. M. Issa <sup>4,5</sup>, Miray Çelikbilek Ersundu <sup>6</sup>, Ali Erçin Ersundu <sup>6</sup>, Gokhan Kilic <sup>7</sup>, Hesham M. H. Zakaly <sup>5,8,\*</sup> and Antoaneta Ene <sup>9,\*</sup>

<sup>1</sup> Department of Physics, College of Science, Princess Nourah Bint Abdulrahman University, Riyadh 11671, Saudi Arabia; gaalmisned@pnu.edu.sa

<sup>2</sup> Department of Medical Diagnostic Imaging, College of Health Sciences, University of Sharjah, 27272 Sharjah, United Arab Emirates; tekin765@gmail.com

<sup>3</sup> Medical Radiation Research Center (USMERA), Uskudar University, 34672 Istanbul, Turkey

<sup>4</sup> Physics Department, Faculty of Science, University of Tabuk, Tabuk 71451, Saudi Arabia; shams\_issa@yahoo.com

<sup>5</sup> Physics Department, Faculty of Science, Al-Azhar University, Assiut 71524, Egypt

<sup>6</sup> Glass Research and Development Laboratory, Department of Metallurgical and Materials Engineering, Faculty of Chemical and Metallurgical Engineering, Yildiz Technical University, 34220 Istanbul, Turkey; miraycelikbilek@gmail.com (M.Ç.E.); ersundu@gmail.com (A.E.E.)

<sup>7</sup> Department of Physics, Faculty of Science and Letters, Eskisehir Osmangazi University, 26040 Eskisehir, Turkey; gkilic@ogu.edu.tr

<sup>8</sup> Institute of Physics and Technology, Ural Federal University, 620000 Ekaterinburg, Russia

<sup>9</sup> INPOLDE Research Center, Department of Chemistry, Faculty of Sciences and Environment, Physics and Environment, Dunarea de Jos University of Galati, 47 Domneasca Street, 800008 Galati, Romania

\* Correspondence: h.m.zakaly@gmail.com or h.m.zakaly@azhar.edu.eg (H.M.H.Z.); Antoaneta.Ene@ugal.ro (A.E.)

**Citation:** ALMisned, G.; Tekin, H.O.; Issa, S.A.M.; Ersundu, M.Ç.; Ersundu, A.E.; Kilic, G.; Zakaly, H.M.H. Novel HMO-Glasses with  $\text{Sb}_2\text{O}_3$  and  $\text{TeO}_2$  for Nuclear Radiation Shielding Purposes: A Comparative Analysis with Traditional and Novel Shields. *Materials* **2021**, *14*, 4330. <https://doi.org/10.3390/ma14154330>

Academic Editor: Gerhard Wilde

Received: 10 July 2021

Accepted: 31 July 2021

Published: 3 August 2021

**Publisher's Note:** MDPI stays neutral with regard to jurisdictional claims in published maps and institutional affiliations.

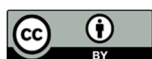

**Copyright:** © 2021 by the author. Licensee MDPI, Basel, Switzerland. This article is an open access article distributed under the terms and conditions of the Creative Commons Attribution (CC BY) license (<http://creativecommons.org/licenses/by/4.0/>).

**Table S1.** (EBF and EABF) G–P fitting coefficients (b, c, a,  $X_k$  and d) of T80 glass sample.

| Energy<br>(MeV) | $Z_{eq}$ | G–P Fitting Parameters for EBF |       |       |        |        | G–P Fitting Parameters for EABF |       |       |        |        |
|-----------------|----------|--------------------------------|-------|-------|--------|--------|---------------------------------|-------|-------|--------|--------|
|                 |          | a                              | b     | c     | d      | $X_k$  | a                               | b     | c     | d      | $X_k$  |
| 0.015           | 25.94    | −0.549                         | 1.004 | 1.553 | 0.350  | 5.612  | −0.549                          | 1.004 | 1.553 | 0.350  | 5.635  |
| 0.020           | 27.56    | 0.697                          | 1.010 | 0.116 | −0.854 | 11.064 | 0.385                           | 1.008 | 0.243 | −0.410 | 15.224 |
| 0.030           | 28.00    | 0.200                          | 1.023 | 0.364 | −0.137 | 17.583 | 0.249                           | 1.020 | 0.353 | −0.182 | 13.713 |
| 0.040           | 44.00    | 0.090                          | 3.843 | 0.562 | −0.057 | 24.158 | 0.102                           | 1.535 | 0.571 | −0.040 | 20.576 |
| 0.050           | 44.41    | −0.126                         | 3.230 | 0.183 | −0.038 | 13.507 | −0.015                          | 1.465 | 0.193 | 0.007  | 10.978 |
| 0.060           | 44.69    | 0.701                          | 2.599 | 0.086 | −0.115 | 13.070 | 0.487                           | 1.413 | 0.106 | −0.104 | 17.135 |
| 0.080           | 49.35    | 0.808                          | 1.797 | 0.018 | −0.160 | 15.371 | 0.721                           | 1.386 | 0.038 | −0.227 | 14.225 |
| 0.100           | 49.75    | 0.676                          | 1.389 | 0.063 | −0.317 | 13.789 | 0.649                           | 1.333 | 0.074 | −0.353 | 13.421 |
| 0.150           | 50.31    | 0.283                          | 1.218 | 0.322 | −0.158 | 13.940 | 0.434                           | 1.438 | 0.178 | −0.238 | 13.855 |
| 0.200           | 50.64    | 0.173                          | 1.255 | 0.495 | −0.093 | 14.579 | 0.333                           | 1.614 | 0.276 | −0.194 | 13.912 |
| 0.300           | 51.03    | 0.110                          | 1.390 | 0.637 | −0.052 | 14.169 | 0.215                           | 1.900 | 0.439 | −0.123 | 13.776 |
| 0.400           | 51.25    | 0.069                          | 1.509 | 0.774 | −0.044 | 14.136 | 0.161                           | 2.226 | 0.571 | −0.113 | 13.868 |
| 0.500           | 51.40    | 0.047                          | 1.584 | 0.857 | −0.036 | 14.068 | 0.114                           | 2.309 | 0.687 | −0.088 | 13.872 |
| 0.600           | 51.50    | 0.028                          | 1.620 | 0.919 | −0.026 | 13.973 | 0.089                           | 2.349 | 0.755 | −0.074 | 13.726 |
| 0.800           | 51.60    | 0.012                          | 1.660 | 0.983 | −0.020 | 13.987 | 0.059                           | 2.315 | 0.846 | −0.057 | 13.625 |
| 1.000           | 51.64    | 0.004                          | 1.665 | 1.015 | −0.018 | 13.383 | 0.043                           | 2.238 | 0.896 | −0.049 | 13.507 |
| 1.500           | 50.83    | −0.020                         | 1.566 | 1.116 | −0.005 | 14.218 | 0.008                           | 1.928 | 1.021 | −0.027 | 13.645 |
| 2.000           | 48.59    | −0.017                         | 1.563 | 1.111 | −0.008 | 13.021 | 0.016                           | 1.849 | 1.002 | −0.036 | 13.112 |
| 3.000           | 45.37    | 0.002                          | 1.542 | 1.062 | −0.030 | 12.906 | 0.040                           | 1.717 | 0.942 | −0.063 | 13.237 |
| 4.000           | 43.98    | 0.016                          | 1.496 | 1.026 | −0.043 | 13.379 | 0.056                           | 1.596 | 0.902 | −0.078 | 13.552 |
| 5.000           | 43.25    | 0.046                          | 1.514 | 0.945 | −0.071 | 13.607 | 0.085                           | 1.568 | 0.832 | −0.104 | 13.798 |
| 6.000           | 42.81    | 0.057                          | 1.495 | 0.922 | −0.080 | 13.831 | 0.097                           | 1.514 | 0.809 | −0.115 | 14.011 |
| 8.000           | 42.23    | 0.080                          | 1.531 | 0.879 | −0.098 | 14.150 | 0.111                           | 1.480 | 0.793 | −0.125 | 14.292 |
| 10.000          | 41.93    | 0.059                          | 1.501 | 0.965 | −0.078 | 14.209 | 0.087                           | 1.412 | 0.878 | −0.101 | 14.350 |
| 15.000          | 41.75    | 0.035                          | 1.567 | 1.116 | −0.060 | 14.165 | 0.063                           | 1.402 | 1.017 | −0.084 | 14.289 |

**Table S2.** (EBF and EABF) G–P fitting coefficients (b, c, a,  $X_k$  and d) of T70 glass sample.

| Energy<br>(MeV) | $Z_{eq}$ | G–P Fitting Parameters for EBF |       |       |        |        | G–P Fitting Parameters for EABF |       |       |        |        |
|-----------------|----------|--------------------------------|-------|-------|--------|--------|---------------------------------|-------|-------|--------|--------|
|                 |          | a                              | b     | c     | d      | $X_k$  | a                               | b     | c     | d      | $X_k$  |
| 0.015           | 25.49    | −0.510                         | 1.004 | 1.488 | 0.335  | 5.709  | −0.509                          | 1.004 | 1.487 | 0.334  | 5.913  |
| 0.020           | 28.49    | 0.741                          | 1.009 | 0.107 | −0.989 | 10.879 | 0.422                           | 1.007 | 0.235 | −0.475 | 13.525 |
| 0.030           | 29.04    | 0.205                          | 1.030 | 0.362 | −0.052 | 12.076 | 0.246                           | 1.019 | 0.373 | −0.177 | 11.323 |
| 0.040           | 43.03    | 0.089                          | 3.890 | 0.447 | −0.045 | 23.781 | 0.104                           | 1.513 | 0.451 | −0.042 | 21.841 |
| 0.050           | 43.45    | −0.201                         | 3.182 | 0.126 | −0.001 | 12.899 | −0.070                          | 1.433 | 0.137 | 0.052  | 9.926  |
| 0.060           | 43.74    | 0.840                          | 2.533 | 0.057 | −0.126 | 14.608 | 0.595                           | 1.383 | 0.077 | −0.134 | 16.366 |
| 0.080           | 48.56    | 0.804                          | 1.783 | 0.020 | −0.170 | 15.274 | 0.706                           | 1.377 | 0.042 | −0.227 | 14.206 |
| 0.100           | 48.98    | 0.641                          | 1.368 | 0.085 | −0.302 | 13.785 | 0.620                           | 1.320 | 0.091 | −0.336 | 13.455 |
| 0.150           | 49.58    | 0.274                          | 1.220 | 0.334 | −0.152 | 13.973 | 0.421                           | 1.438 | 0.188 | −0.232 | 13.872 |
| 0.200           | 49.92    | 0.171                          | 1.263 | 0.500 | −0.092 | 14.617 | 0.326                           | 1.630 | 0.283 | −0.191 | 13.921 |
| 0.300           | 50.34    | 0.107                          | 1.400 | 0.644 | −0.051 | 14.210 | 0.208                           | 1.911 | 0.451 | −0.118 | 13.806 |
| 0.400           | 50.57    | 0.067                          | 1.521 | 0.782 | −0.043 | 14.138 | 0.156                           | 2.244 | 0.581 | −0.110 | 13.869 |
| 0.500           | 50.73    | 0.045                          | 1.596 | 0.863 | −0.036 | 14.064 | 0.111                           | 2.335 | 0.696 | −0.086 | 13.871 |
| 0.600           | 50.83    | 0.026                          | 1.631 | 0.926 | −0.026 | 13.994 | 0.086                           | 2.369 | 0.764 | −0.073 | 13.727 |
| 0.800           | 50.94    | 0.010                          | 1.670 | 0.990 | −0.019 | 14.029 | 0.056                           | 2.329 | 0.854 | −0.056 | 13.627 |
| 1.000           | 50.99    | 0.003                          | 1.673 | 1.021 | −0.017 | 13.402 | 0.041                           | 2.246 | 0.903 | −0.048 | 13.504 |
| 1.500           | 50.11    | −0.021                         | 1.569 | 1.121 | −0.005 | 14.289 | 0.005                           | 1.918 | 1.033 | −0.024 | 13.658 |
| 2.000           | 47.70    | −0.017                         | 1.568 | 1.113 | −0.008 | 12.970 | 0.014                           | 1.849 | 1.008 | −0.035 | 13.106 |
| 3.000           | 44.31    | 0.001                          | 1.547 | 1.063 | −0.030 | 12.886 | 0.038                           | 1.718 | 0.946 | −0.061 | 13.228 |
| 4.000           | 42.90    | 0.016                          | 1.501 | 1.024 | −0.043 | 13.369 | 0.055                           | 1.598 | 0.904 | −0.076 | 13.535 |
| 5.000           | 42.14    | 0.046                          | 1.518 | 0.942 | −0.070 | 13.592 | 0.084                           | 1.570 | 0.833 | −0.103 | 13.782 |
| 6.000           | 41.68    | 0.056                          | 1.496 | 0.923 | −0.079 | 13.808 | 0.094                           | 1.511 | 0.815 | −0.111 | 14.006 |
| 8.000           | 41.10    | 0.078                          | 1.521 | 0.883 | −0.096 | 14.112 | 0.107                           | 1.469 | 0.802 | −0.120 | 14.276 |
| 10.000          | 40.81    | 0.058                          | 1.485 | 0.965 | −0.077 | 14.187 | 0.083                           | 1.398 | 0.884 | −0.098 | 14.348 |
| 15.000          | 40.61    | 0.037                          | 1.538 | 1.104 | −0.060 | 14.189 | 0.062                           | 1.382 | 1.011 | −0.083 | 14.328 |

**Table S3.** (EBF and EABF) G–P fitting coefficients (b, c, a,  $X_k$  and d) of T60 glass sample.

| Energy<br>(MeV) | $Z_{eq}$ | G–P Fitting Parameters for EBF |       |       |        |        | G–P Fitting Parameters for EABF |       |       |        |        |
|-----------------|----------|--------------------------------|-------|-------|--------|--------|---------------------------------|-------|-------|--------|--------|
|                 |          | a                              | b     | c     | d      | $X_k$  | a                               | b     | c     | d      | $X_k$  |
| 0.015           | 25.01    | −0.469                         | 1.004 | 1.418 | 0.319  | 5.811  | −0.467                          | 1.004 | 1.417 | 0.317  | 6.208  |
| 0.020           | 29.35    | 0.740                          | 1.059 | 0.166 | −1.027 | 10.862 | 0.428                           | 1.013 | 0.289 | −0.494 | 12.790 |
| 0.030           | 30.01    | 0.196                          | 1.261 | 0.426 | −0.066 | 13.853 | 0.234                           | 1.063 | 0.437 | −0.172 | 12.801 |
| 0.040           | 42.04    | 0.088                          | 3.939 | 0.327 | −0.033 | 23.388 | 0.107                           | 1.490 | 0.326 | −0.045 | 23.161 |
| 0.050           | 42.46    | −0.280                         | 3.132 | 0.066 | 0.038  | 12.260 | −0.127                          | 1.399 | 0.079 | 0.100  | 8.820  |
| 0.060           | 42.76    | 0.987                          | 2.463 | 0.028 | −0.138 | 16.240 | 0.709                           | 1.352 | 0.047 | −0.166 | 15.550 |
| 0.080           | 47.75    | 0.799                          | 1.769 | 0.021 | −0.180 | 15.172 | 0.691                           | 1.368 | 0.046 | −0.227 | 14.187 |
| 0.100           | 48.18    | 0.604                          | 1.345 | 0.108 | −0.287 | 13.782 | 0.589                           | 1.307 | 0.108 | −0.319 | 13.491 |
| 0.150           | 48.81    | 0.265                          | 1.222 | 0.349 | −0.146 | 14.015 | 0.409                           | 1.439 | 0.200 | −0.225 | 13.893 |
| 0.200           | 49.17    | 0.171                          | 1.281 | 0.501 | −0.093 | 14.588 | 0.325                           | 1.687 | 0.285 | −0.192 | 13.931 |
| 0.300           | 49.61    | 0.105                          | 1.413 | 0.651 | −0.050 | 14.242 | 0.203                           | 1.938 | 0.461 | −0.116 | 13.831 |
| 0.400           | 49.87    | 0.065                          | 1.534 | 0.790 | −0.042 | 14.141 | 0.151                           | 2.266 | 0.592 | −0.108 | 13.871 |
| 0.500           | 50.04    | 0.043                          | 1.609 | 0.871 | −0.036 | 14.060 | 0.107                           | 2.362 | 0.705 | −0.085 | 13.870 |
| 0.600           | 50.14    | 0.024                          | 1.643 | 0.934 | −0.025 | 14.016 | 0.083                           | 2.392 | 0.773 | −0.071 | 13.730 |
| 0.800           | 50.25    | 0.009                          | 1.679 | 0.996 | −0.018 | 14.073 | 0.054                           | 2.343 | 0.862 | −0.055 | 13.629 |
| 1.000           | 50.30    | 0.002                          | 1.681 | 1.026 | −0.016 | 13.421 | 0.039                           | 2.255 | 0.911 | −0.047 | 13.501 |
| 1.500           | 49.35    | −0.022                         | 1.574 | 1.125 | −0.004 | 13.763 | 0.003                           | 1.919 | 1.039 | −0.023 | 13.646 |
| 2.000           | 46.77    | −0.018                         | 1.573 | 1.115 | −0.007 | 12.916 | 0.012                           | 1.849 | 1.014 | −0.033 | 13.101 |
| 3.000           | 43.23    | 0.001                          | 1.551 | 1.064 | −0.029 | 12.865 | 0.036                           | 1.719 | 0.951 | −0.059 | 13.220 |
| 4.000           | 41.79    | 0.016                          | 1.506 | 1.023 | −0.043 | 13.354 | 0.053                           | 1.599 | 0.908 | −0.074 | 13.528 |
| 5.000           | 41.02    | 0.044                          | 1.516 | 0.946 | −0.068 | 13.569 | 0.080                           | 1.562 | 0.843 | −0.098 | 13.804 |
| 6.000           | 40.55    | 0.054                          | 1.490 | 0.928 | −0.076 | 13.764 | 0.089                           | 1.501 | 0.827 | −0.106 | 14.028 |
| 8.000           | 39.98    | 0.074                          | 1.507 | 0.889 | −0.093 | 14.063 | 0.101                           | 1.455 | 0.814 | −0.115 | 14.258 |
| 10.000          | 39.69    | 0.056                          | 1.469 | 0.965 | −0.075 | 14.164 | 0.080                           | 1.384 | 0.890 | −0.094 | 14.347 |
| 15.000          | 39.50    | 0.038                          | 1.510 | 1.093 | −0.061 | 14.213 | 0.062                           | 1.362 | 1.006 | −0.081 | 14.368 |

**Table S4.** EBF and EABF) G–P fitting coefficients (b, c, a,  $X_k$  and d) of S80 glass sample.

| Energy<br>(MeV) | $Z_{eq}$ | G–P Fitting Parameters for EBF |       |       |        |        | G–P Fitting Parameters for EABF |       |       |        |        |
|-----------------|----------|--------------------------------|-------|-------|--------|--------|---------------------------------|-------|-------|--------|--------|
|                 |          | a                              | b     | c     | d      | $X_k$  | a                               | b     | c     | d      | $X_k$  |
| 0.015           | 25.49    | −0.511                         | 1.004 | 1.489 | 0.336  | 5.707  | −0.510                          | 1.004 | 1.488 | 0.334  | 5.909  |
| 0.020           | 26.54    | 0.647                          | 1.011 | 0.125 | −0.700 | 11.275 | 0.342                           | 1.009 | 0.253 | −0.336 | 17.162 |
| 0.030           | 26.86    | 0.194                          | 1.026 | 0.370 | −0.238 | 24.197 | 0.251                           | 1.024 | 0.333 | −0.187 | 16.620 |
| 0.040           | 45.10    | 0.092                          | 3.791 | 0.689 | −0.070 | 24.575 | 0.099                           | 1.559 | 0.704 | −0.037 | 19.178 |
| 0.050           | 45.41    | −0.050                         | 3.278 | 0.241 | −0.075 | 14.125 | 0.040                           | 1.498 | 0.249 | −0.039 | 12.048 |
| 0.060           | 45.63    | 0.566                          | 2.663 | 0.113 | −0.104 | 11.573 | 0.382                           | 1.441 | 0.134 | −0.075 | 17.883 |
| 0.080           | 48.53    | 0.803                          | 1.783 | 0.020 | −0.170 | 15.270 | 0.706                           | 1.377 | 0.042 | −0.227 | 14.206 |
| 0.100           | 48.83    | 0.634                          | 1.364 | 0.089 | −0.299 | 13.785 | 0.614                           | 1.318 | 0.094 | −0.333 | 13.462 |
| 0.150           | 49.25    | 0.270                          | 1.221 | 0.340 | −0.150 | 13.991 | 0.416                           | 1.439 | 0.193 | −0.229 | 13.881 |
| 0.200           | 49.49    | 0.171                          | 1.274 | 0.501 | −0.092 | 14.601 | 0.326                           | 1.663 | 0.284 | −0.191 | 13.926 |
| 0.300           | 49.78    | 0.105                          | 1.410 | 0.649 | −0.050 | 14.237 | 0.204                           | 1.929 | 0.459 | −0.116 | 13.826 |
| 0.400           | 49.95    | 0.065                          | 1.532 | 0.789 | −0.042 | 14.140 | 0.152                           | 2.262 | 0.591 | −0.108 | 13.870 |
| 0.500           | 50.06    | 0.043                          | 1.609 | 0.870 | −0.036 | 14.060 | 0.107                           | 2.362 | 0.705 | −0.085 | 13.870 |
| 0.600           | 50.12    | 0.024                          | 1.643 | 0.934 | −0.025 | 14.016 | 0.083                           | 2.392 | 0.773 | −0.071 | 13.730 |
| 0.800           | 50.20    | 0.008                          | 1.680 | 0.997 | −0.018 | 14.077 | 0.054                           | 2.344 | 0.863 | −0.055 | 13.629 |
| 1.000           | 50.22    | 0.001                          | 1.682 | 1.027 | −0.016 | 13.424 | 0.039                           | 2.256 | 0.912 | −0.047 | 13.501 |
| 1.500           | 49.56    | −0.021                         | 1.573 | 1.124 | −0.004 | 13.937 | 0.003                           | 1.918 | 1.038 | −0.024 | 13.650 |
| 2.000           | 47.78    | −0.017                         | 1.568 | 1.113 | −0.008 | 12.975 | 0.015                           | 1.849 | 1.007 | −0.035 | 13.107 |
| 3.000           | 45.32    | 0.002                          | 1.542 | 1.062 | −0.030 | 12.905 | 0.040                           | 1.717 | 0.942 | −0.063 | 13.236 |
| 4.000           | 44.26    | 0.016                          | 1.494 | 1.027 | −0.043 | 13.381 | 0.057                           | 1.595 | 0.901 | −0.078 | 13.556 |
| 5.000           | 43.69    | 0.046                          | 1.512 | 0.945 | −0.071 | 13.613 | 0.086                           | 1.567 | 0.831 | −0.105 | 13.805 |
| 6.000           | 43.35    | 0.057                          | 1.494 | 0.923 | −0.080 | 13.838 | 0.098                           | 1.514 | 0.808 | −0.116 | 14.018 |
| 8.000           | 42.91    | 0.080                          | 1.530 | 0.882 | −0.098 | 14.151 | 0.111                           | 1.480 | 0.794 | −0.125 | 14.296 |
| 10.000          | 42.66    | 0.058                          | 1.502 | 0.971 | −0.078 | 14.207 | 0.087                           | 1.413 | 0.881 | −0.102 | 14.345 |
| 15.000          | 42.54    | 0.034                          | 1.574 | 1.125 | −0.060 | 14.142 | 0.063                           | 1.407 | 1.023 | −0.085 | 14.266 |

**Table S5.** (EBF and EABF) G–P fitting coefficients (b, c, a,  $X_k$  and d) of S70 glass sample.

| Energy<br>(MeV) | $Z_{eq}$ | G–P Fitting Parameters for EBF |       |       |        |        | G–P Fitting Parameters for EABF |       |       |        |        |
|-----------------|----------|--------------------------------|-------|-------|--------|--------|---------------------------------|-------|-------|--------|--------|
|                 |          | a                              | b     | c     | d      | $X_k$  | a                               | b     | c     | d      | $X_k$  |
| 0.015           | 25.23    | −0.488                         | 1.004 | 1.450 | 0.327  | 5.765  | −0.486                          | 1.004 | 1.449 | 0.325  | 6.075  |
| 0.020           | 27.28    | 0.683                          | 1.011 | 0.118 | −0.812 | 11.122 | 0.373                           | 1.008 | 0.246 | −0.390 | 15.753 |
| 0.030           | 27.69    | 0.199                          | 1.023 | 0.365 | −0.164 | 19.341 | 0.249                           | 1.021 | 0.348 | −0.183 | 14.486 |
| 0.040           | 44.42    | 0.091                          | 3.823 | 0.611 | −0.062 | 24.318 | 0.101                           | 1.544 | 0.622 | −0.039 | 20.039 |
| 0.050           | 44.74    | −0.100                         | 3.246 | 0.202 | −0.051 | 13.717 | 0.004                           | 1.476 | 0.212 | −0.009 | 11.343 |
| 0.060           | 44.97    | 0.659                          | 2.619 | 0.094 | −0.112 | 12.610 | 0.455                           | 1.422 | 0.115 | −0.095 | 17.365 |
| 0.080           | 48.08    | 0.801                          | 1.775 | 0.021 | −0.176 | 15.214 | 0.697                           | 1.372 | 0.045 | −0.227 | 14.195 |
| 0.100           | 48.40    | 0.614                          | 1.352 | 0.101 | −0.291 | 13.783 | 0.597                           | 1.310 | 0.103 | −0.323 | 13.481 |
| 0.150           | 48.85    | 0.265                          | 1.222 | 0.348 | −0.147 | 14.013 | 0.409                           | 1.439 | 0.200 | −0.225 | 13.892 |
| 0.200           | 49.11    | 0.171                          | 1.283 | 0.501 | −0.093 | 14.586 | 0.325                           | 1.692 | 0.285 | −0.192 | 13.931 |
| 0.300           | 49.41    | 0.104                          | 1.418 | 0.653 | −0.050 | 14.248 | 0.202                           | 1.949 | 0.463 | −0.115 | 13.836 |
| 0.400           | 49.59    | 0.064                          | 1.539 | 0.793 | −0.042 | 14.142 | 0.150                           | 2.280 | 0.596 | −0.107 | 13.872 |
| 0.500           | 49.71    | 0.042                          | 1.615 | 0.875 | −0.035 | 14.069 | 0.106                           | 2.375 | 0.710 | −0.084 | 13.871 |
| 0.600           | 49.78    | 0.023                          | 1.649 | 0.937 | −0.025 | 14.018 | 0.081                           | 2.402 | 0.778 | −0.071 | 13.731 |
| 0.800           | 49.87    | 0.008                          | 1.685 | 1.000 | −0.018 | 14.089 | 0.053                           | 2.350 | 0.867 | −0.054 | 13.630 |
| 1.000           | 49.90    | 0.001                          | 1.686 | 1.030 | −0.016 | 13.430 | 0.038                           | 2.260 | 0.915 | −0.046 | 13.501 |
| 1.500           | 49.18    | −0.022                         | 1.575 | 1.126 | −0.004 | 13.622 | 0.003                           | 1.919 | 1.040 | −0.023 | 13.642 |
| 2.000           | 47.26    | −0.018                         | 1.571 | 1.114 | −0.008 | 12.945 | 0.014                           | 1.849 | 1.011 | −0.034 | 13.104 |
| 3.000           | 44.65    | 0.001                          | 1.545 | 1.063 | −0.030 | 12.893 | 0.039                           | 1.718 | 0.945 | −0.062 | 13.231 |
| 4.000           | 43.55    | 0.016                          | 1.498 | 1.025 | −0.043 | 13.375 | 0.056                           | 1.597 | 0.903 | −0.077 | 13.545 |
| 5.000           | 42.95    | 0.046                          | 1.515 | 0.944 | −0.071 | 13.603 | 0.085                           | 1.568 | 0.832 | −0.104 | 13.794 |
| 6.000           | 42.60    | 0.057                          | 1.496 | 0.922 | −0.080 | 13.828 | 0.097                           | 1.514 | 0.810 | −0.114 | 14.008 |
| 8.000           | 42.14    | 0.080                          | 1.531 | 0.879 | −0.098 | 14.150 | 0.111                           | 1.480 | 0.792 | −0.125 | 14.291 |
| 10.000          | 41.88    | 0.059                          | 1.500 | 0.965 | −0.078 | 14.208 | 0.087                           | 1.412 | 0.879 | −0.101 | 14.350 |
| 15.000          | 41.76    | 0.035                          | 1.567 | 1.116 | −0.060 | 14.165 | 0.063                           | 1.402 | 1.017 | −0.084 | 14.288 |

**Table S6.** (EBF and EABF) G–P fitting coefficients (b, c, a,  $X_k$  and d) of S60 glass sample.

| Energy<br>(MeV) | $Z_{eq}$ | G–P Fitting Parameters for EBF |       |       |        |        | G–P Fitting Parameters for EABF |       |       |        |        |
|-----------------|----------|--------------------------------|-------|-------|--------|--------|---------------------------------|-------|-------|--------|--------|
|                 |          | a                              | b     | c     | d      | $X_k$  | a                               | b     | c     | d      | $X_k$  |
| 0.015           | 24.92    | −0.461                         | 1.004 | 1.406 | 0.316  | 5.830  | −0.459                          | 1.004 | 1.404 | 0.314  | 6.263  |
| 0.020           | 28.04    | 0.720                          | 1.010 | 0.111 | −0.924 | 10.968 | 0.404                           | 1.007 | 0.239 | −0.444 | 14.339 |
| 0.030           | 28.55    | 0.203                          | 1.021 | 0.361 | −0.089 | 14.484 | 0.248                           | 1.018 | 0.363 | −0.179 | 12.352 |
| 0.040           | 43.65    | 0.090                          | 3.860 | 0.520 | −0.053 | 24.021 | 0.103                           | 1.527 | 0.528 | −0.041 | 21.037 |
| 0.050           | 43.99    | −0.159                         | 3.209 | 0.158 | −0.022 | 13.243 | −0.039                          | 1.451 | 0.169 | 0.027  | 10.522 |
| 0.060           | 44.23    | 0.767                          | 2.567 | 0.072 | −0.121 | 13.805 | 0.539                           | 1.399 | 0.092 | −0.118 | 16.767 |
| 0.080           | 47.58    | 0.798                          | 1.766 | 0.022 | −0.182 | 15.151 | 0.687                           | 1.367 | 0.047 | −0.227 | 14.183 |
| 0.100           | 47.91    | 0.591                          | 1.338 | 0.116 | −0.281 | 13.780 | 0.578                           | 1.302 | 0.114 | −0.312 | 13.503 |
| 0.150           | 48.40    | 0.259                          | 1.223 | 0.357 | −0.143 | 14.038 | 0.402                           | 1.440 | 0.207 | −0.221 | 13.905 |
| 0.200           | 48.67    | 0.171                          | 1.294 | 0.502 | −0.093 | 14.569 | 0.325                           | 1.725 | 0.287 | −0.192 | 13.937 |
| 0.300           | 49.00    | 0.103                          | 1.426 | 0.657 | −0.049 | 14.260 | 0.200                           | 1.971 | 0.468 | −0.114 | 13.848 |
| 0.400           | 49.20    | 0.062                          | 1.548 | 0.798 | −0.042 | 14.144 | 0.148                           | 2.299 | 0.602 | −0.106 | 13.874 |
| 0.500           | 49.33    | 0.041                          | 1.623 | 0.879 | −0.035 | 14.081 | 0.104                           | 2.390 | 0.716 | −0.083 | 13.872 |
| 0.600           | 49.40    | 0.023                          | 1.655 | 0.941 | −0.024 | 14.014 | 0.080                           | 2.414 | 0.783 | −0.070 | 13.732 |
| 0.800           | 49.50    | 0.007                          | 1.690 | 1.003 | −0.018 | 14.086 | 0.051                           | 2.357 | 0.871 | −0.054 | 13.632 |
| 1.000           | 49.52    | 0.000                          | 1.690 | 1.032 | −0.016 | 13.430 | 0.037                           | 2.265 | 0.919 | −0.045 | 13.503 |
| 1.500           | 48.75    | −0.022                         | 1.578 | 1.128 | −0.004 | 13.260 | 0.002                           | 1.920 | 1.043 | −0.023 | 13.632 |
| 2.000           | 46.68    | −0.018                         | 1.574 | 1.115 | −0.007 | 12.911 | 0.012                           | 1.849 | 1.015 | −0.033 | 13.100 |
| 3.000           | 43.90    | 0.001                          | 1.548 | 1.063 | −0.030 | 12.878 | 0.037                           | 1.718 | 0.948 | −0.061 | 13.225 |
| 4.000           | 42.76    | 0.016                          | 1.501 | 1.024 | −0.043 | 13.367 | 0.055                           | 1.598 | 0.904 | −0.076 | 13.532 |
| 5.000           | 42.14    | 0.046                          | 1.518 | 0.942 | −0.070 | 13.592 | 0.084                           | 1.570 | 0.833 | −0.103 | 13.782 |
| 6.000           | 41.75    | 0.056                          | 1.496 | 0.922 | −0.079 | 13.811 | 0.095                           | 1.512 | 0.814 | −0.112 | 14.005 |
| 8.000           | 41.28    | 0.078                          | 1.523 | 0.882 | −0.096 | 14.120 | 0.107                           | 1.471 | 0.800 | −0.121 | 14.279 |
| 10.000          | 41.03    | 0.058                          | 1.488 | 0.965 | −0.077 | 14.191 | 0.084                           | 1.401 | 0.883 | −0.098 | 14.349 |
| 15.000          | 40.89    | 0.036                          | 1.545 | 1.107 | −0.060 | 14.183 | 0.063                           | 1.387 | 1.013 | −0.083 | 14.318 |
